# Supplementary material for: Inter-laboratory agreement on embryo classification and clinical decision: Conventional morphological assessment vs. time lapse
Source: PubMed Central journal article supplement (PMC5571938; doi:10.1371/journal.pone.0183328), 2017-08-25
Supplement: pone.0183328.s001.pdf [file pone.0183328.s001.pdf]

S1 Table. Mean times and standard deviations of the morphokinetic events of the embryos analysed with EmbryoScope.

| EmbryoScope | tPB2     | tPNa     | tPNf      | tSt2      | t2        | t3        | t4        | t5        | t6         | t7         |
|-------------|----------|----------|-----------|-----------|-----------|-----------|-----------|-----------|------------|------------|
| B1O1        | 5,7 ±1,9 | 9,7 ±0,6 | 29,1 ±0,2 | 32,0 ±0,6 | 34,3 ±2,6 | 44,9 ±4,5 | 45,0 ±4,6 | 51,2 ±6,1 | 53,9 ±7,0  | 61,0 ±15,1 |
| B1O2        | 5,0 ±2,3 | 6,5 ±0,7 | 20,4 ±0,3 | 22,7 ±0,3 | 23,6 ±0,6 | 36,0 ±2,7 | 36,0 ±0,6 | 47,5 ±0,2 | 47,7 ±0,3  | 48,3 ±0,8  |
| B1O3        | 5,4 ±1,4 | 8,4 ±1,6 | 26,6 ±0,3 | 29,0 ±0,1 | 30,1 ±0,9 | 44,9 ±0,4 | 46,0 ±0,8 | 63,0 ±0,0 | 63,5 ±0,7  | 65,9 ±1,4  |
| B1O4        | 4,8 ±2,2 | 7,3 ±1,2 | 23,4 ±0,2 | 25,3 ±0,2 | 25,7 ±0,3 | 36,8 ±0,3 | 37,4 ±0,2 | 52,8 ±0,2 | 55,6 ±0,3  | 63,8 ±4,3  |
| B1O5        |          |          |           |           |           |           |           |           |            |            |
| B1O6        | 3,7 ±0,3 | 8,1 ±1,1 | 23,8 ±0,4 | 25,9 ±0,3 | 26,6 ±0,4 | 40,2 ±1,7 | 41,4 ±0,2 | 65,8 ±0,3 | 68,6 ±0,3  | 68,8 ±0,4  |
| B1O7        | 3,7 ±0,3 | 7,4 ±0,8 | 22,8 ±0,4 | 24,8 ±0,7 | 26,0 ±1,2 | 34,7 ±3,1 | 36,6 ±0,8 | 49,9 ±0,3 | 50,5 ±0,0  | 50,5 ±0,2  |
| B1O8        | 4,1 ±1,2 | 7,8 ±1,9 | 24,1 ±0,4 | 26,1 ±0,4 | 29,5 ±3,8 | 34,9 ±4,7 | 37,7 ±0,3 | 52,4 ±0,2 | 52,8 ±0,2  | 54,6 ±0,2  |
| B1O9        | 4,0 ±0,4 | 8,0 ±1,3 | 24,6 ±0,3 | 26,7 ±0,6 | 29,1 ±3,0 | 37,5 ±0,3 | 38,1 ±1,1 | 52,0 ±0,0 | 52,0 ±0,1  | 53,3 ±1,2  |
| B1O10       | 3,8 ±0,0 | 8,3 ±1,0 | 22,6 ±0,3 | 24,8 ±0,2 | 25,2 ±0,3 | 36,6 ±0,6 | 37,3 ±0,0 | 38,9 ±4,4 | 50,8 ±0,5  | 52,4 ±0,8  |
| B1O11       | 3,8 ±0,0 | 7,3 ±0,5 | 23,1 ±3,6 | 26,6 ±4,6 | 31,6 ±6,3 | 42,6 ±5,3 | 47,5 ±2,3 | 50,8 ±7,3 | 70,6 ±0,6  | 73,7 ±3,8  |
| B1O12       | 5,4 ±3,2 | 8,0 ±0,9 | 35,1 ±0,2 | 38,0 ±1,0 | 39,1 ±0,3 | 39,7 ±0,6 | 51,2 ±4,8 | 53,4 ±0,3 | 65,3 ±10,0 | 70,8 ±7,5  |
| B2O1        |          |          |           |           |           |           |           |           |            |            |
| B2O2        | 4,7 ±0,8 | 7,9 ±1,1 | 22,9 ±0,3 | 25,1 ±0,1 | 25,5 ±0,4 | 34,7 ±3,2 | 37,6 ±1,0 | 49,6 ±0,2 | 50,4 ±0,4  | 50,0 ±3,6  |
| B2O3        | 2,7 ±0,4 | 7,9 ±1,0 | 21,0 ±0,5 | 22,8 ±0,1 | 23,2 ±0,2 | 34,3 ±0,1 | 34,7 ±0,3 | 46,4 ±0,2 | 48,8 ±0,2  | 49,2 ±0,3  |
| B2O4        | 2,9 ±0,5 | 8,0 ±1,5 | 23,6 ±0,3 | 25,7 ±0,2 | 26,1 ±0,1 | 38,2 ±0,2 | 38,3 ±0,2 | 53,7 ±0,4 | 54,5 ±0,3  | 55,2 ±0,2  |
| B2O5        | 3,9 ±1,1 | 9,4 ±2,0 | 21,4 ±0,4 | 23,7 ±0,2 | 24,8 ±1,3 | 30,7 ±5,5 | 34,8 ±4,3 | 46,6 ±4,4 | 50,6 ±0,4  | 58,0 ±9,3  |
| B2O6        |          |          |           |           |           |           |           |           |            |            |
| B2O7        | 4,0 ±0,6 | 9,8 ±2,2 | 24,1 ±0,2 | 26,3 ±0,1 | 26,7 ±0,4 | 26,9 ±0,3 | 31,9 ±7,3 | 37,1 ±0,2 | 38,4 ±0,4  | 51,6 ±5,4  |
| B2O8        | 3,8 ±1,1 | 7,9 ±1,4 | 23,3 ±0,4 | 24,6 ±0,5 | 25,8 ±0,3 | 28,9 ±3,4 | 37,4 ±0,2 | 39,1 ±3,6 | 47,9 ±4,3  | 55,8 ±1,8  |
| B2O9        | 5,1 ±2,6 | 8,7 ±1,3 | 22,7 ±0,4 | 24,6 ±0,3 | 25,0 ±0,5 | 35,3 ±0,2 | 36,0 ±0,1 | 48,4 ±0,2 | 48,7 ±1,3  | 52,4 ±1,6  |
| B2O10       | 5,4 ±3,2 | 8,0 ±0,9 | 35,1 ±0,2 | 38,0 ±1,0 | 39,1 ±0,3 | 39,7 ±0,6 | 51,2 ±4,8 | 53,4 ±0,3 | 65,3 ±10,0 | 70,8 ±7,5  |
| B3O1        | 3,4 ±0,4 | 8,7 ±0,7 | 23,6 ±0,3 | 25,2 ±0,4 | 26,0 ±0,1 | 37,3 ±0,1 | 37,6 ±0,2 | 49,4 ±0,2 | 52,8 ±0,2  | 53,2 ±0,3  |
| B3O2        | 3,0 ±0,5 | 6,9 ±0,4 | 23,8 ±0,4 | 26,2 ±0,2 | 26,7 ±0,2 | 30,3 ±2,8 | 37,0 ±0,5 | 38,7 ±4,2 | 48,9 ±0,5  | 49,7 ±0,8  |
| B3O3        | 5,0 ±1,8 | 7,9 ±1,0 | 24,0 ±0,2 | 26,5 ±0,2 | 27,1 ±0,2 | 39,2 ±0,2 | 42,1 ±0,1 | 51,0 ±0,0 | 55,0 ±3,6  | 65,5 ±0,3  |
| B3O4        |          |          |           |           |           |           |           |           |            |            |
| B3O5        | 3,9 ±0,5 | 9,1 ±0,7 | 23,6 ±0,7 | 26,0 ±0,2 | 26,3 ±0,2 | 37,5 ±0,2 | 38,1 ±0,2 | 50,3 ±0,1 | 50,7 ±0,3  | 52,0 ±0,0  |
| B3O6        | 4,5 ±1,2 | 9,6 ±1,7 | 24,6 ±0,6 | 26,3 ±0,5 | 27,1 ±0,2 | 33,2 ±3,7 | 37,4 ±0,9 | 44,0 ±6,3 | 50,5 ±1,2  | 55,7 ±11,4 |
| B3O7        | 3,6 ±1,3 | 8,0 ±2,0 | 22,1 ±0,3 | 24,8 ±0,2 | 25,3 ±0,1 | 33,6 ±3,7 | 35,3 ±0,2 | 46,7 ±0,0 | 46,7 ±0,3  | 47,5 ±0,3  |
| B3O8        | 3,9 ±0,3 | 8,2 ±0,5 | 25,9 ±0,5 | 28,3 ±0,0 | 28,5 ±0,2 | 39,3 ±0,2 | 39,7 ±0,3 | 52,5 ±0,3 | 53,0 ±0,0  | 53,1 ±0,3  |
| B3O9        | 3,9 ±0,5 | 8,2 ±0,6 | 24,4 ±0,8 | 27,2 ±0,3 | 27,6 ±0,2 | 38,6 ±0,2 | 39,0 ±0,0 | 52,1 ±0,2 | 52,7 ±0,2  | 53,6 ±0,3  |

S1 Table. Mean times and standard deviations of the morphokinetic events of the embryos analysed with EmbryoScope (continuation).

| EmbryoScope | t8         | t9         | tM         | tSB        | tB         | tE          | tHN        | tH         |
|-------------|------------|------------|------------|------------|------------|-------------|------------|------------|
| B101        | 66,1 ±9,6  | 78,0 ±12,7 | 107,1      | 110,2 ±2,7 |            |             |            |            |
| B102        | 50,0 ±1,1  | 63,8 ±10   | 82,6 ±2,3  | 95,0 ±5,5  | 105,0 ±6,0 | 105,0 ±35,9 | 118,0      |            |
| B103        | 70,1 ±2,0  | 96,0 ±0,3  | 96,7 ±5,5  | 107,5 ±4,6 | 117,4 ±0,8 |             |            |            |
| B104        | 72,3 ±8,2  | 89,4 ±1,0  | 86,1 ±11,1 | 106,9 ±3,1 |            |             |            |            |
| B105        |            |            |            |            |            |             |            |            |
| B106        | 79,6 ±12,7 |            | 83,8 ±2,5  | 97,3 ±5,2  | 112,1      |             |            |            |
| B107        | 51,3 ±0,2  | 73,0 ±0,5  | 81,2 ±1,8  | 87,5 ±5,0  | 97,3 ±4,5  | 106,6 ±5,2  | 110,2 ±4,8 |            |
| B108        | 60,7 ±0,4  |            | 72,5 ±5,4  | 95,2 ±7,8  | 107,0 ±4,0 | 115,1 ±2,0  | 113,7 ±2,1 |            |
| B109        | 56,6 ±1,2  | 72,3 ±10,4 | 81,8 ±3,9  | 91,1 ±3,0  | 99,0 ±4,7  | 111,3 ±4,7  | 113,2 ±4,1 |            |
| B1010       | 55,6 ±1,7  | 59,0 ±0,8  | 86,5 ±11,8 | 112,0 ±4,2 | 117,5      |             |            |            |
| B1011       | 80,4 ±1,1  | 84,2 ±5,0  | 91,5 ±3,2  | 105,1 ±0,2 |            |             |            |            |
| B1012       | 75,7 ±1,2  | 76,8 ±0,2  | 101,5 ±5,6 | 103,9 ±0,5 |            |             |            |            |
| B201        |            |            |            |            |            |             |            |            |
| B202        | 52,9 ±3,0  | 71,3 ±0,5  | 81,6 ±5,6  | 93,3 ±4,1  | 98,9 ±4,5  | 106,4 ±2,8  | 111,8 ±3,9 | 119,5 ±0,0 |
| B203        | 55,8 ±7,1  | 64,2 ±6,1  | 81,2 ±6,2  | 97,9 ±3,3  | 103,8 ±2,3 | 110,8 ±2,1  |            |            |
| B204        | 57,7 ±6,7  | 73,4 ±1,7  | 82,3 ±2,1  | 98,6 ±5,2  | 109,6 ±3,5 | 115,5 ±1,9  | 117,0      |            |
| B205        | 63,7 ±1,8  | 73,0 ±0,4  | 89,8 ±4,8  | 100,9 ±7,3 | 111,9 ±2,2 | 119,1 ±1,0  |            |            |
| B206        |            |            |            |            |            |             |            |            |
| B207        | 49,9 ±0,5  | 50,5 ±0,7  | 61,5 ±3,3  |            |            |             |            |            |
| B208        | 57,3 ±2,3  | 65,5 ±12,9 | 86,8 ±3,1  |            |            |             |            |            |
| B209        | 58,7 ±5,9  | 72,5 ±8,3  | 83,8 ±4,9  | 97,2 ±4,3  | 102,8 ±2,5 | 110,8 ±3,6  | 113,6 ±2,8 | 118,7 ±1,0 |
| B2010       | 75,7 ±1,2  | 76,8 ±0,2  | 101,5 ±5,6 | 103,9 ±0,5 |            |             |            |            |
| B301        | 54,2 ±0,1  | 73,6 ±0,8  | 82,8 ±2,4  | 101,3 ±3,8 | 109,7 ±3,6 | 116,8 ±1,5  |            |            |
| B302        | 50,8 ±0,8  | 57,9 ±9,5  | 84,4 ±8,8  | 99,1 ±3,5  | 105,4 ±2,9 | 114,0 ±4,2  | 116,0      |            |
| B303        | 67,6 ±0,3  | 71,4 ±0,5  | 86,6 ±9,3  | 105,3 ±4,2 | 114,2 ±3,7 |             |            |            |
| B304        |            |            |            |            |            |             |            |            |
| B305        | 54,5 ±5,8  | 69,6 ±2,0  | 81,8 ±4,7  | 102,0 ±4,5 | 111,7 ±4,0 | 118,4 ±0,5  |            |            |
| B306        | 68,7 ±8,2  | 79,2 ±24,8 | 100,8 ±7,7 | 108,1 ±1,6 |            |             |            |            |
| B307        | 50,1 ±6,7  | 66,6 ±0,2  | 80,9 ±8,4  | 94,7 ±1,9  | 101,0 ±2,9 | 113,4 ±3,3  | 115,1      |            |
| B308        | 54,8 ±0,3  | 75,7 ±0,5  | 87,1 ±5,2  | 99,7 ±3,0  | 106,8 ±2,4 | 115,1 ±1,9  | 116,2 ±1,5 |            |
| B309        | 54,0 ±0,5  | 74,5 ±0,5  | 89,5 ±6,7  | 101,2 ±5,4 | 108,5 ±1,5 | 114,9 ±2,2  | 115,9 ±1,1 |            |
