# Supplementary material for: Inter-laboratory agreement on embryo classification and clinical decision: Conventional morphological assessment vs. time lapse
Source: PubMed Central journal article supplement (PMC5571938; doi:10.1371/journal.pone.0183328), 2017-08-25
Supplement: pone.0183328.s002.pdf [file pone.0183328.s002.pdf]

S2 Table. Mean times and standard deviations of the morphokinetic events of the embryos analysed with Primo Vision.

| Primo Vision | tPB2     | tPNa      | tPNf      | tSt2      | t2        | t3        | t4        | t5        | t6         | t7         |
|--------------|----------|-----------|-----------|-----------|-----------|-----------|-----------|-----------|------------|------------|
| B1O1         | 2,8 ±0,5 | 8,6 ±1,4  | 23,8 ±1,7 | 26,0 ±1,9 | 27,0 ±1,4 | 38,3 ±1,1 | 39,7 ±1,4 | 50,5 ±1,0 | 50,9 ±1,0  | 52,0 ±1,4  |
| B1O2         |          |           |           |           |           |           |           |           |            |            |
| B1O3         | 1,9 ±0,6 | 10,7 ±1,6 | 21,0 ±0,2 | 23,3 ±0,2 | 23,9 ±0,4 | 34,7 ±0,1 | 35,2 ±0,6 | 48,0 ±0,1 | 48,6 ±0,4  | 49,3 ±0,9  |
| B1O4         | 2,6 ±0,4 | 6,9 ±1,0  | 25,2 ±0,3 | 27,4 ±0,2 | 27,8 ±0,2 | 31,4 ±2,0 | 39,4 ±0,4 | 41,4 ±2,0 | 50,9 ±1,4  | 53,8 ±1,7  |
| B1O5         |          |           |           |           |           |           |           |           |            |            |
| B1O6         | 2,4 ±0,4 | 12,4 ±3,0 | 22,1 ±0,4 | 25,0 ±0,2 | 25,9 ±0,7 | 38,1 ±0,1 | 38,8 ±0,7 | 51,5 ±0,1 | 52,0 ±0,3  | 52,8 ±1,0  |
| B1O7         | 2,2 ±0,4 | 6,9 ±1,7  | 20,9 ±0,4 | 23,6 ±0,2 | 24,3 ±0,2 | 36,1 ±0,5 | 37,5 ±0,8 | 39,4 ±2,9 | 49,9 ±0,3  | 52,8 ±7,6  |
| B1O8         | 2,5 ±0,5 | 9,8 ±1,6  | 20,9 ±1,2 | 23,7 ±0,2 | 24,2 ±0,3 | 26,4 ±0,2 | 28,2 ±1,5 | 40,5 ±0,7 | 43,1 ±0,9  | 54,9 ±8,7  |
| B1O9         | 2,2 ±1,0 | 6,7 ±2,3  | 22,2 ±0,3 | 24,5 ±0,2 | 25,4 ±0,7 | 28,6 ±0,6 | 38,2 ±0,3 | 39,1 ±0,5 | 52,1 ±0,7  | 54,2 ±0,2  |
| B1O10        | 2,9 ±0,5 | 8,5 ±1,5  | 22,2 ±0,6 | 24,3 ±0,2 | 24,8 ±0,2 | 27,3 ±0,7 | 36,4 ±1,0 | 37,5 ±1,7 | 41,1 ±2,7  | 47,0 ±3,3  |
| B1O11        | 3,2 ±3,6 | 11,7 ±3,3 | 32,2 ±0,6 | 35,0 ±0,2 | 36,0 ±1,0 | 54,7 ±0,6 | 58,8 ±0,4 | 60,7 ±1,9 | 63,6 ±9,5  | 64,2 ±11,1 |
| B1O12        | 2,8 ±1,5 | 10,3 ±3,4 | 23,1 ±0,5 | 25,3 ±0,1 | 27,4 ±3,4 | 37,7 ±0,1 | 38,3 ±0,6 | 51,7 ±0,1 | 54,5 ±6,6  | 54,7 ±6,4  |
| B1O13        | 3,3 ±1,2 | 8,1 ±1,3  | 23,6 ±0,6 | 26,2 ±0,1 | 26,9 ±0,8 | 40,3 ±0,1 | 41,3 ±0,7 | 46,1 ±5,9 | 54,1 ±4,6  | 56,7 ±0,8  |
| B1O14        | 3,2 ±0,6 | 9,1 ±2,5  | 24,0 ±0,5 | 26,0 ±0,3 | 27,0 ±0,9 | 39,1 ±1,4 | 40,8 ±4,1 | 52,3 ±0,5 | 54,2 ±0,7  | 56,5 ±3,6  |
| B2O1         | 3,2 ±0,6 | 9,1 ±2,5  | 24,0 ±0,5 | 26,0 ±0,3 | 27,0 ±0,9 | 39,1 ±1,4 | 40,8 ±4,1 | 52,3 ±0,5 | 54,2 ±0,7  | 56,5 ±3,6  |
| B2O2         | 2,2 ±0,7 | 7,7 ±1,7  | 22,8 ±0,4 | 26,5 ±3,6 | 27,9 ±3,4 | 36,9 ±4,0 | 40,5 ±3,7 | 52,4 ±6,1 | 58,0 ±6,4  | 61,3 ±6,2  |
| B2O3         |          |           |           |           |           |           |           |           |            |            |
| B2O4         | 3,0 ±2,2 | 10,1 ±2,4 | 22,0 ±0,5 | 24,3 ±0,2 | 24,7 ±0,3 | 37,4 ±5,0 | 43,1 ±7,0 | 55,4 ±8,2 | 62,1 ±10,1 | 72,9 ±12,8 |
| B2O5         | 3,2 ±1,3 | 9,1 ±1,9  | 24,1 ±0,6 | 26,0 ±0,4 | 27,1 ±1,6 | 36,8 ±2,6 | 38,3 ±0,6 | 48,0 ±6,4 | 53,2 ±0,7  | 62,6 ±10,9 |
| B2O6         | 3,2 ±0,6 | 9,1 ±2,5  | 24,0 ±0,5 | 26,0 ±0,3 | 27,0 ±0,9 | 39,1 ±1,4 | 40,8 ±4,1 | 52,3 ±0,5 | 54,2 ±0,7  | 56,5 ±3,6  |
| B2O7         | 3,3 ±0,8 | 9,1 ±2,1  | 23,2 ±0,7 | 25,6 ±0,5 | 26,4 ±0,8 | 37,3 ±0,2 | 38,3 ±1,0 | 50,5 ±0,1 | 50,8 ±0,2  | 51,2 ±0,5  |
| B2O8         | 2,6 ±1,8 | 12,5 ±2,9 | 22,9 ±0,7 | 27,5 ±0,3 | 28,2 ±1,1 | 40,1 ±0,3 | 41,4 ±0,7 | 53,1 ±0,6 | 67,0 ±5,1  | 71,7 ±4,3  |
| B2O9         | 3,4 ±1,1 | 9,5 ±2,2  | 19,6 ±0,5 | 21,8 ±0,5 | 22,8 ±1,5 | 32,6 ±0,2 | 33,8 ±0,7 | 42,3 ±2,2 | 44,9 ±1,1  | 47,5 ±3,0  |
| B2O10        | 2,2 ±0,6 | 7,9 ±1,3  | 19,7 ±0,3 | 21,9 ±0,2 | 23,1 ±2,3 | 32,0 ±2,3 | 32,9 ±0,2 | 34,3 ±0,6 | 37,5 ±4,3  | 43,9 ±3,8  |
| B2O11        | 3,9 ±1,0 | 9,0 ±1,5  | 25,0 ±0,3 | 27,0 ±0,5 | 28,1 ±0,3 | 30,7 ±3,3 | 35,2 ±5,2 | 37,6 ±9,7 | 41,8 ±3,6  | 43,7 ±11,0 |
| B2O12        | 3,2 ±2,0 | 12,4 ±1,8 | 23,4 ±0,5 | 25,4 ±0,1 | 26,4 ±2,0 | 34,9 ±4,5 | 37,1 ±2,7 | 44,0 ±7,1 | 49,6 ±5,4  | 52,2 ±3,8  |
| B3O1         | 2,2 ±0,8 | 7,8 ±1,5  | 19,9 ±1,3 | 22,5 ±1,0 | 24,1 ±1,8 | 35,9 ±0,2 | 36,5 ±0,6 | 48,2 ±0,9 | 49,1 ±1,1  | 50,3 ±1,5  |
| B3O2         | 2,7 ±0,6 | 6,9 ±1,3  | 23,5 ±0,5 | 25,3 ±0,3 | 27,0 ±2,0 | 36,5 ±0,3 | 38,0 ±1,1 | 47,6 ±0,4 | 48,5 ±0,7  | 50,9 ±4,4  |
| B3O3         | 2,5 ±0,8 | 7,6 ±1,4  | 20,9 ±0,4 | 22,8 ±0,2 | 23,7 ±1,1 | 34,6 ±0,1 | 35,2 ±0,9 | 46,1 ±0,2 | 46,9 ±0,5  | 47,6 ±0,8  |
| B3O4         | 3,3 ±0,9 | 10,6 ±1,9 | 21,1 ±0,4 | 23,0 ±0,2 | 24,1 ±1,3 | 34,2 ±0,1 | 34,6 ±0,5 | 45,4 ±0,2 | 46,1 ±0,3  | 46,9 ±0,6  |
| B3O5         | 2,3 ±0,6 | 9,0 ±1,1  | 20,4 ±0,6 | 22,3 ±0,2 | 23,3 ±1,1 | 33,9 ±0,1 | 34,6 ±0,7 | 44,5 ±0,2 | 44,8 ±0,2  | 45,6 ±0,8  |
| B3O6         | 2,3 ±0,8 | 10,4 ±2,1 | 23,7 ±0,5 | 25,3 ±0,4 | 26,2 ±0,6 | 37,5 ±0,2 | 38,5 ±0,9 | 50,2 ±0,1 | 51,0 ±1,0  | 53,4 ±2,0  |
| B3O7         |          |           |           |           |           |           |           |           |            |            |
| B3O8         | 2,4 ±0,9 | 8,7 ±1,4  | 25,3 ±0,5 | 27,2 ±0,1 | 28,1 ±0,7 | 38,6 ±0,1 | 39,1 ±0,7 | 51,3 ±0,4 | 51,8 ±0,3  | 52,4 ±0,7  |
| B3O9         | 4,6 ±0,3 | 13,0 ±6,8 | 32,6 ±0,4 | 35,4 ±1,0 | 55,5 ±5,3 |           |           |           |            |            |
