# Supplementary material for: Inter-laboratory agreement on embryo classification and clinical decision: Conventional morphological assessment vs. time lapse
Source: PubMed Central journal article supplement (PMC5571938; doi:10.1371/journal.pone.0183328), 2017-08-25
Supplement: pone.0183328.s003.pdf [file pone.0183328.s003.pdf]

S3 Table. Morphological characteristics and clinical decision of the embryos analysed with EmbryoScope.

| Embryoscope | Number PN | Size PN              | Opposition 2PN | Direct division 1 to 3 cells | Direct division 3 to 5 cells | False cleavage | Asymmetry         |
|-------------|-----------|----------------------|----------------|------------------------------|------------------------------|----------------|-------------------|
| B1O1        | 2 (100%)  | Symmetrical (88.9%)  | Yes (66.7%)    | No (77.8%)                   | No (66.7%)                   | No (55.6%)     | Asymmetry (100%)  |
| B1O2        | 2 (100%)  | Symmetrical (100%)   | Yes (77.8%)    | No (100%)                    | No (100%)                    | No (100%)      | Symmetry (77.8%)  |
| B1O3        | 2 (100%)  | Symmetrical (88.9%)  | Yes (77.8%)    | No (100%)                    | No (100%)                    | No (100%)      | Symmetry (100%)   |
| B1O4        | 2 (100%)  | Symmetrical (100%)   | Yes (77.8%)    | No (77.8%)                   | No (66.7%)                   | Yes (55.6%)    | Symmetry (88.9%)  |
| B1O5        | 2 (66.6%) | Asymmetrical (85.7%) | Yes (85.7%)    | No (100%)                    | No (100%)                    | No (60%)       | Symmetry (100%)   |
| B1O6        | 2 (100%)  | Symmetrical (100%)   | Yes (88.9%)    | No (100%)                    | No (100%)                    | No (88.9%)     | Symmetry (88.9%)  |
| B1O7        | 2 (100%)  | Symmetrical (100%)   | Yes (88.9%)    | No (100%)                    | No (100%)                    | No (100%)      | Symmetry (100%)   |
| B1O8        | 2 (100%)  | Symmetrical (100%)   | Yes (88.9%)    | Yes (77.8%)                  | No (100%)                    | Yes (88.9%)    | Asymmetry (77.8%) |
| B1O9        | 2 (100%)  | Symmetrical (88.9%)  | Yes (77.8%)    | No (100%)                    | No (100%)                    | No (100%)      | Asymmetry (88.9%) |
| B1O10       | 2 (100%)  | Symmetrical (88.9%)  | Yes (88.9%)    | No (100%)                    | Yes (88.9%)                  | No (100%)      | Asymmetry (77.8%) |
| B1O11       | 2 (100%)  | Symmetrical (100%)   | Yes (88.9%)    | No (55.6%)                   | Yes (100%)                   | Yes (88.9%)    | Asymmetry (66.7%) |
| B1O12       | 2 (100%)  | Symmetrical (100%)   | Yes (87.5%)    | Yes (62.5%)                  | No (100%)                    | No (83.3%)     | Asymmetry (83.3%) |
| B2O1        | 0 (100%)  |                      |                |                              |                              |                |                   |
| B2O2        | 2 (100%)  | Symmetrical (100%)   | Yes (88.9%)    | No (100%)                    | No (100%)                    | No (100%)      | Asymmetry (88.9%) |
| B2O3        | 2 (100%)  | Symmetrical (100%)   | Yes (77.8%)    | No (100%)                    | No (100%)                    | No (100%)      | Symmetry (88.9%)  |
| B2O4        | 2 (100%)  | Symmetrical (88.9%)  | Yes (88.9%)    | No (100%)                    | No (100%)                    | No (100%)      | Symmetry (77.8%)  |
| B2O5        | 2 (100%)  | Symmetrical (100%)   | Yes (77.8%)    | No (77.8%)                   | No (100%)                    | Yes (77.8%)    | Asymmetry (75.0%) |
| B2O6        | 0 (100%)  |                      |                |                              |                              |                |                   |
| B2O7        | 2 (100%)  | Symmetrical (100%)   | Yes (88.9%)    | Yes (77.8%)                  | Yes (57.1%)                  | No (100%)      | Asymmetry (62.5%) |
| B2O8        | 2 (100%)  | Symmetrical (100%)   | Yes (88.9%)    | No (100%)                    | No (55.6%)                   | No (77.8%)     | Asymmetry (75.0%) |
| B2O9        | 2 (100%)  | Symmetrical (100%)   | Yes (88.9%)    | No (100%)                    | No (100%)                    | No (100%)      | Asymmetry (66.7%) |
| B2O10       | 2 (100%)  | Symmetrical (88.9%)  | Yes (88.9%)    | No (100%)                    | No (100%)                    | No (100%)      | Symmetry (88.9%)  |
| B3O1        | 2 (100%)  | Symmetrical (100%)   | Yes (87.5%)    | No (100%)                    | No (100%)                    | No (100%)      | Asymmetry (75.0%) |
| B3O2        | 2 (100%)  | Symmetrical (100%)   | Yes (75.0%)    | No (100%)                    | No (87.5%)                   | No (100%)      | Asymmetry (62.5%) |
| B3O3        | 2 (100%)  | Symmetrical (100%)   | Yes (87.5%)    | No (100%)                    | No (100%)                    | No (100%)      | Symmetry (75.0%)  |
| B3O4        | 0 (100%)  |                      |                |                              |                              |                |                   |
| B3O5        | 2 (100%)  | Symmetrical (87.5%)  | Yes (75.0%)    | No (100%)                    | No (100%)                    | No (100%)      | Symmetry (87.5%)  |
| B3O6        | 2 (100%)  | Symmetrical (100%)   | Yes (75.0%)    | No (100%)                    | No (100%)                    | No (62.5%)     | Asymmetry (87.5%) |
| B3O7        | 2 (100%)  | Symmetrical (100%)   | Yes (87.5%)    | No (100%)                    | No (100%)                    | No (75.0%)     | Symmetry (85.7%)  |
| B3O8        | 2 (100%)  | Symmetrical (100%)   | Yes (87.5%)    | No (100%)                    | No (100%)                    | No (100%)      | Symmetry (87.5%)  |
| B3O9        | 2 (100%)  | Symmetrical (100%)   | Yes (87.5%)    | No (100%)                    | No (100%)                    | No (100%)      | Symmetry (62.5%)  |

S3 Table. Morphological characteristics and clinical decision of the embryos analysed with EmbryoScope (continuation).

| Embryoscope | Fragmentation   | Multinucleation  | Vacuoles         | Quality Day 2 | Quality Day 3 | Quality Day 5 | Decision             |
|-------------|-----------------|------------------|------------------|---------------|---------------|---------------|----------------------|
| B1O1        | >10-25% (50%)   | Absence (100%)   | Presence (88.9%) | C (88.9%)     | C (77.8%)     | D (85.7%)     | Discard (100%)       |
| B1O2        | >10-25% (55.6%) | Absence (100%)   | Absence (100%)   | B (66.7%)     | B (55.6%)     | C (55.6%)     | Cryopreserve (88.9%) |
| B1O3        | ≤10% (100%)     | Absence (100%)   | Absence (100%)   | A (55.7%)     | A (55.7%)     | C (57.1%)     | Cryopreserve (55.6%) |
| B1O4        | ≤10% (100%)     | Presence (61.1%) | Presence (55.6%) | D (77.8%)     | D (88.9%)     | D (100%)      | Discard (100%)       |
| B1O5        | ≤10% (100%)     | Absence (100%)   | Absence (100%)   | D (100%)      | D (100%)      | D (100%)      | Discard (100%)       |
| B1O6        | ≤10% (100%)     | Absence (100%)   | Absence (100%)   | A (100%)      | D (44.4%)     | D (100%)      | Discard (100%)       |
| B1O7        | >10-25% (88.9%) | Absence (100%)   | Absence (100%)   | B (66.7%)     | B (66.7%)     | B (66.7%)     | Transfer (55.6%)     |
| B1O8        | ≤10% (100%)     | Absence (100%)   | Presence (77.7%) | NC (33.3%)    | NC (44.4%)    | C (55.6%)     | Cryopreserve (55.6%) |
| B1O9        | >10-25% (66.7%) | Absence (100%)   | Absence (88.9%)  | NC (33.3%)    | C (55.6%)     | B (44.4%)     | Cryopreserve (55.6%) |
| B1O10       | ≤10% (100%)     | Absence (100%)   | Presence (66.7%) | C (55.6%)     | B (55.6%)     | D (100%)      | Discard (100%)       |
| B1O11       | >10-25% (77.8%) | Absence (100%)   | Absence (88.9%)  | B (44.4%)     | D (77.8%)     | D (100%)      | Discard (100%)       |
| B1O12       | 26-35% (42.9%)  | Absence (90.9%)  | Presence (57.1%) | D (62.5%)     | D (75.0%)     | D (100%)      | Discard (100%)       |
| B2O1        |                 |                  |                  |               |               |               |                      |
| B2O2        | ≤10% (88.9%)    | Absence (83.3%)  | Absence (66.7%)  | NC (33.3%)    | B (44.4%)     | C (44.4%)     | Cryopreserve (77.8%) |
| B2O3        | >10-25% (66.7%) | Absence (100%)   | Presence (77.7%) | B (75.0%)     | NC (50.0%)    | C (50.0%)     | Cryopreserve (100%)  |
| B2O4        | >10-25% (56.6%) | Absence (100%)   | Presence (100%)  | A (66.7%)     | C (44.4%)     | D (44.4%)     | Cryopreserve (55.6%) |
| B2O5        | ≤10% (100%)     | Absence (81.25%) | Absence (100%)   | A (66.7%)     | NC (44.4%)    | C (44.4%)     | Cryopreserve (66.7%) |
| B2O6        |                 |                  |                  |               |               |               |                      |
| B2O7        | ≤10% (100%)     | Absence (93.3%)  | Absence (100%)   | C (37.5%)     | C (62.5%)     | D (100%)      | Discard (100%)       |
| B2O8        | >10-25% (75.0%) | Absence (93.3%)  | Absence (100%)   | C (44.4%)     | C (55.6%)     | D (100%)      | Discard (100%)       |
| B2O9        | ≤10% (88.9%)    | Absence (100%)   | Absence (100%)   | A (56.6%)     | B (66.7%)     | A (88.9%)     | Transfer (100%)      |
| B2O10       | ≤10% (88.9%)    | Absence (100%)   | Absence (100%)   | A (66.7%)     | A (56.6%)     | C (55.6%)     | Cryopreserve (88.9%) |
| B3O1        | ≤10% (100%)     | Absence (93.8%)  | Presence (87.5%) | NC (37.5%)    | A (50.0%)     | B (50.0%)     | Cryopreserve (100%)  |
| B3O2        | ≤10% (75.0%)    | Absence (100%)   | Presence (62.5%) | NC (37.5%)    | C (50.0%)     | C (50.0%)     | Cryopreserve (75.0%) |
| B3O3        | ≤10% (87.5%)    | Absence (93.8%)  | Absence (87.5%)  | A (62.5%)     | NC (37.5%)    | C (87.5%)     | Cryopreserve (62.5%) |
| B3O4        |                 |                  |                  |               |               |               |                      |
| B3O5        | ≤10% (100%)     | Absence (100%)   | Presence (87.5%) | A (75%)       | A (75%)       | C (50.0%)     | Cryopreserve (100%)  |
| B3O6        | ≤10% (75.0%)    | Absence (93.3%)  | Presence (62.5%) | NC (50%)      | C (87.5%)     | D (83.3%)     | Discard (100%)       |
| B3O7        | ≤10% (100%)     | Absence (100%)   | Presence (62.5%) | A (87.5%)     | NC (37.5%)    | A (50.0%)     | Transfer (75.0%)     |
| B3O8        | ≤10% (100%)     | Absence (100%)   | NC (50%)         | A (87.5%)     | A (87.5%)     | A (50.0%)     | Cryopreserve (87.5%) |
| B3O9        | ≤10% (87.5%)    | Absence (100%)   | Absence (62.5%)  | A (50.0%)     | A (50.0%)     | A (50.0%)     | Cryopreserve (75.0%) |
