# Supplementary material for: Inter-laboratory agreement on embryo classification and clinical decision: Conventional morphological assessment vs. time lapse
Source: PubMed Central journal article supplement (PMC5571938; doi:10.1371/journal.pone.0183328), 2017-08-25
Supplement: pone.0183328.s004.pdf [file pone.0183328.s004.pdf]

S4 Table. Morphological characteristics and clinical decision of the embryos analysed with Primo Vision.

| Primo Vision | Number PN | Size PN                 | Opposition 2PN      | Direct division | Direct division | False       | Asymmetry         | Fragmentation  |
|--------------|-----------|-------------------------|---------------------|-----------------|-----------------|-------------|-------------------|----------------|
|              |           |                         |                     | 1 to 3 cells    | 3 to 5 cells    | cleavage    |                   |                |
| B1O1         | 2 (100%)  | Yes (93,75%)            | Symmetrical (100%)  | No (100%)       | No (100%)       | No (100%)   | Symmetry (76.9%)  | ≤10% (100%)    |
| B1O2         | 0 (100%)  |                         |                     |                 |                 |             |                   |                |
| B1O3         | 2 (100%)  | Yes (87.5%)             | Symmetrical (87.5%) | No (100%)       | No (100%)       | No (100%)   | Symmetry (78.6%)  | ≤10% (100%)    |
| B1O4         | 2 (100%)  | Yes (87.5%)             | Symmetrical (100%)  | No (57.1%)      | No (57.1%)      | No (64.3%)  | Asymmetry (61.5%) | ≤10% (71.4%)   |
| B1O5         | 0 (100%)  |                         |                     |                 |                 |             |                   |                |
| B1O6         | 2 (100%)  | Yes (87.5%)             | Symmetrical (93.8%) | No (100%)       | No (92.9%)      | No (100%)   | Symmetry (92.9%)  | ≤10% (92.9%)   |
| B1O7         | 2 (100%)  | Yes (81.3%)             | Symmetrical (75%)   | No (93.3%)      | No (64.3%)      | No (100%)   | Symmetry (57.4%)  | ≤10% (92.8%)   |
| B1O8         | 2 (100%)  | Yes (75% <sup>9</sup> ) | Symmetrical (100%)  | No (71.4%)      | No (85.7%)      | No (57.1%)  | Asymmetry (85.7%) | NC (46.7%)     |
| B1O9         | 2 (100%)  | Yes (81.3%)             | Symmetrical (100%)  | No (71.4%)      | No (64.3%)      | No (92.9%)  | Asymmetry (71.4%) | ≤10% (66.6%)   |
| B1O10        | 2 (100%)  | Yes (87.5%)             | Symmetrical (100%)  | No (57.1%)      | No (71.4%)      | No (60.0%)  | Asymmetry (53.9%) | ≤10% (71.4%)   |
| B1O11        | 2 (100%)  | Yes (87.5%)             | Symmetrical (100%)  | No (57.1%)      | No (71.4%)      | No (60.0%)  | NC (50%)          | ≤10% (71.4%)   |
| B1O12        | 2 (100%)  | Yes (93.8%)             | Symmetrical (87.5%) | No (100%)       | No (100%)       | No (85.7%)  | Symmetry (100%)   | ≤10% (100%)    |
| B1O13        | 2 (100%)  | Yes (93.8%)             | Symmetrical (93.8%) | No (100%)       | No (85.7%)      | No (100%)   | Asymmetry (85.7%) | ≤10% (73.3%)   |
| B1O14        | 2 (100%)  | Yes (87.5%)             | Symmetrical (100%)  | No (100%)       | No (92.9%)      | No (64.3%)  | Asymmetry (85.7%) | ≤10% (85.7%)   |
| B2O1         | 2 (100%)  | Yes (86.7%)             | Symmetrical (86.7%) | No (100%)       | No (100%)       | No (100%)   | Symmetry (100%)   | ≤10% (100%)    |
| B2O2         | 2 (100%)  | Yes (93.3%)             | Symmetrical (100%)  | No (78.6%)      | No (100%)       | No (85.7%)  | Asymmetry (61.5%) | >35% (93.3%)   |
| B2O3         | 0 (90.9%) |                         |                     |                 |                 |             |                   |                |
| B2O4         | 2 (87.5%) | Yes (92.9%)             | Symmetrical (100%)  | No (100%)       | No (92.3%)      | No (53.9%)  | Asymmetry (92.3%) | >35% (57.1%)   |
| B2O5         | 2 (100%)  | Yes (93.3%)             | Symmetrical (100%)  | No (100%)       | No (100%)       | No (71.4%)  | Symmetry (71.43%) | 26-35% (46.7%) |
| B2O6         | 2 (100%)  | Yes (86.7%)             | Symmetrical (86.7%) | No (76.9%)      | No (100%)       | Yes (100%)  | Asymmetry (92.9%) | NC (33.3%)     |
| B2O7         | 2 (100%)  | Yes (93.3%)             | Symmetrical (87.5%) | No (100%)       | No (100%)       | No (78.6%)  | Symmetry (100%)   | ≤10% (92.9%)   |
| B2O8         | 2 (87.5%) | Yes (69.2%)             | Symmetrical (78.6%) | No (100%)       | No (100%)       | No (100%)   | Asymmetry (78.6%) | ≤10% (53.3%)   |
| B2O9         | 2 (100%)  | Yes (93.3%)             | Symmetrical (100%)  | No (100%)       | No (100%)       | No (78.6%)  | Symmetry (78.6%)  | ≤10% (64.3%)   |
| B2O10        | 2 (100%)  | Yes (93.3%)             | Symmetrical (100%)  | No (100%)       | No (85.7%)      | No (76.9%)  | Asymmetry (57.1%) | ≤10% (57.2%)   |
| B2O11        | 2 (100%)  | Yes (86.7%)             | Symmetrical (81.3%) | Yes (71.4%)     | No (71.4%)      | No (76.9%)  | Asymmetry (86.7%) | 26-35% (60.0%) |
| B2O12        | 2 (100%)  | Yes (86.7%)             | Symmetrical (87.5%) | No (92.9%)      | No (85.7%)      | No (57.1%)  | NC (50%)          | >10-25% (60%)  |
| B3O1         | 2 (100%)  | Yes (93.3%)             | Symmetrical (100%)  | No (100%)       | No (100%)       | No (100%)   | Symmetry (85.7%)  | ≤10% (100%)    |
| B3O2         | 2 (100%)  | Yes (93.3%)             | Symmetrical (100%)  | No (100%)       | No (100%)       | No (71.4%)  | Symmetry (57.1%)  | NC (50%)       |
| B3O3         | 2 (100%)  | Yes (93.3%)             | Symmetrical (87.5%) | No (100%)       | No (100%)       | No (100%)   | Symmetry (100%)   | ≤10% (92.9%)   |
| B3O4         | 2 (100%)  | Yes (86.7%)             | Symmetrical (100%)  | No (100%)       | No (100%)       | No (100%)   | Symmetry (100%)   | ≤10% (92.9%)   |
| B3O5         | 2 (100%)  | Yes (93.3%)             | Symmetrical (100%)  | No (92.9%)      | No (100%)       | No (100%)   | Symmetry (85.7%)  | ≤10% (100%)    |
| B3O6         | 2 (100%)  | Yes (80.0%)             | Symmetrical (100%)  | No (100%)       | No (100%)       | No (100%)   | Symmetry (78.6%)  | ≤10% (95.7%)   |
| B3O7         | 0 (100%)  |                         |                     |                 |                 |             |                   |                |
| B3O8         | 2 (100%)  | Yes (93.3%)             | Symmetrical (100%)  | No (100%)       | No (100%)       | No (100%)   | Symmetry (85.7%)  | ≤10% (92.9%)   |
| B3O9         | 2 (93.3%) | Yes (60.0%)             | Symmetrical (85.7%) | No (100%)       | No (100%)       | Yes (75.0%) | Symmetry (100%)   | NC (50%)       |

S4 Table. Morphological characteristics and clinical decision of the embryos analysed with Primo Vision (continuation).

| Primo Vision | Multinucleation  | Vacuoles         | Quality Day 2 | Quality Day 3 | Quality Day 5 | Decision             |
|--------------|------------------|------------------|---------------|---------------|---------------|----------------------|
| B1O1         | Absence (74.1%)  | Absence (100%)   | A (53.3%)     | NC (33.3%)    | C (66.7%)     | Cryopreserve (60%)   |
| B1O2         |                  |                  |               |               |               |                      |
| B1O3         | Absence (88.9%)  | Absence (100%)   | A (73.3%)     | A (40.0%)     | D (66.7%)     | Discard (92.9%)      |
| B1O4         | Absence (74.1%)  | Absence (92.9%)  | B (40.0%)     | B (40.0%)     | D (92.9%)     | Discard (100%)       |
| B1O5         |                  |                  |               |               |               |                      |
| B1O6         | Absence (92.9%)  | Absence (100%)   | A (92.9%)     | A (85.7.9%)   | D (78.6%)     | Discard (92.3%)      |
| B1O7         | NC (50.0%)       | Absence (71.4%)  | B (46.7%)     | B (40.0%)     | A (53.3%)     | Cryopreserve (66.7%) |
| B1O8         | Absence (60.7%)  | Presence (93.3%) | D (73.3%)     | D (73.3%)     | D (100%)      | Discard (100%)       |
| B1O9         | Absence (92.9%)  | Absence (100%)   | B (73.3%)     | B (66.7%)     | C (60.0%)     | Cryopreserve (93.3%) |
| B1O10        | Absence (88.9%)  | Presence (78.5%) | C (60%)       | C (60%)       | D (86.7%)     | Discard (100%)       |
| B1O11        | Absence (92.9%)  | Absence (100%)   | B (66.7%)     | D (64.3%)     | D (66.7%)     | Discard (71.4%)      |
| B1O12        | Absence (72.4%)  | Absence (93.3%)  | A (64.3%)     | A (64.3%)     | A (35.7%)     | Transfer (50.0%)     |
| B1O13        | Absence (69.0%)  | Absence (53.3%)  | B (46.7%)     | B (46.7%)     | C (40.0%)     | Cryopreserve (80.0%) |
| B1O14        | Absence (62.1%)  | Absence (93.3%)  | NC (28.7%)    | NC (28.7%)    | D (57.1%)     | Discard (61.5%)      |
| B2O1         | Absence (96.6%)  | Presence (78.6%) | A (80.0%)     | A (73.3%)     | A (40.0%)     | Transfer (53.3%)     |
| B2O2         | Absence (96.2%)  | Absence (92.3%)  | D (66.7%)     | D (80.0%)     | D (100%)      | Discard (92.3%)      |
| B2O3         |                  |                  |               |               |               |                      |
| B2O4         | Absence (92.3%)  | Absence (61.5%)  | D (50.0%)     | D (71.4%)     | D (100%)      | Discard (100%)       |
| B2O5         | Absence (89.3%)  | Presence (93.4%) | C (46.7%)     | C (60.0%)     | C (53.3%)     | Discard (53.9%)      |
| B2O6         | NC (50.0%)       | Presence (64.3%) | D (93.3%)     | D (100%)      | D (100%)      | Discard (100%)       |
| B2O7         | Absence (75.9%)  | Absence (53.3%)  | A (66.7%)     | A (60%)       | C (46.7%)     | Cryopreserve (71.4%) |
| B2O8         | Absence (92.9%)  | Presence (86.7%) | A (53.3%)     | C (53.3%)     | D (100%)      | Discard (100%)       |
| B2O9         | Absence (89.3%)  | Absence (86.7%)  | B (33.3%)     | B (53.3%)     | NC (33.3%)    | Cryopreserve (53.3%) |
| B2O10        | Absence (82.1%)  | Absence (78.6%)  | C (53.3%)     | C (53.3%)     | D (66.7%)     | Discard (78.6%)      |
| B2O11        | Absence (100%)   | Absence (64.3%)  | D (60.0%)     | D (53.3%)     | D (53.3%)     | Discard (85.7%)      |
| B2O12        | Absence (92.3%)  | Presence (73.3%) | B (50.0%)     | B (50.0%)     | C (64.3%)     | Cryopreserve (84.6%) |
| B3O1         | Absence (62.1%)  | Absence (85.7%)  | A (40.0%)     | A (53.3%)     | C (40.0%)     | Cryopreserve (64.3%) |
| B3O2         | Presence (53.6%) | Absence (64.3%)  | NC (26.7%)    | NC (33.3%)    | D (80%)       | Discard (92.9%)      |
| B3O3         | Absence (82.1%)  | Absence (78.6%)  | A (86.7%)     | A (46.7%)     | A (46.7%)     | Cryopreserve (73.3%) |
| B3O4         | Absence (100%)   | Absence (100%)   | A (80.0%)     | A (46.7%)     | A (60.0%)     | Transfer (60.0%)     |
| B3O5         | Absence (96.4%)  | Absence (100%)   | A (66.7%)     | A (60.0%)     | B (40.0%)     | Cryopreserve (80.0%) |
| B3O6         | Absence (55.2%)  | Absence (92.9%)  | A (40.0%)     | NC (33.3%)    | A (40.0%)     | Cryopreserve (73.3%) |
| B3O7         |                  |                  |               |               |               |                      |
| B3O8         | Presence (62.1%) | Absence (100%)   | A (40.0%)     | NC (33.3%)    | A (53.3%)     | Cryopreserve (85.7%) |
| B3O9         | Absence (100%)   | Absence (100%)   | D (100%)      | D (100%)      | D (100%)      | Discard (100%)       |
