# Supplementary material for: Inter-laboratory agreement on embryo classification and clinical decision: Conventional morphological assessment vs. time lapse
Source: PubMed Central journal article supplement (PMC5571938; doi:10.1371/journal.pone.0183328), 2017-08-25
Supplement: pone.0183328.s005.pdf [file pone.0183328.s005.pdf]

S5 Table. Morphological characteristics of the Day 2 and Day 3 embryos analysed with CMA.

| CMA     | Day 2             |                 |                  |                  | Classification |
|---------|-------------------|-----------------|------------------|------------------|----------------|
|         | Asymmetry         | Fragmentation   | Multinucleation  | Vacuoles         |                |
| B1O1/13 | Symmetry (100%)   | ≤10% (92.3%)    | Abscense (98,9%) | Abscense (100%)  | A (87.2%)      |
| B1O2/13 | Symmetry (89,7%)  | ≤10% (100%)     | Abscense (100%)  | Abscense (100%)  | A (82.1%)      |
| B1O3/13 | Symmetry (100%)   | ≤10% (100%)     | Abscense (100%)  | Abscense (100%)  | A (89.7%)      |
| B1O4/13 | Symmetry (89,7%)  | ≤10% (92.3%)    | Abscense (87.2%) | Abscense (100%)  | A (51.3%)      |
| B1O5/13 | Symmetry (92,1%)  | ≤10% (94.7%)    | Abscense (100%)  | Abscense (100%)  | A (71.5%)      |
| B2O1/13 | Symmetry (87,2%)  | ≤10% (56,4%)    | Abscense (97.4%) | Abscense (100%)  | B (43.6%)      |
| B2O2/13 | Asymmetry (97,3%) | >10-25% (76.9%) | Abscense (100%)  | Abscense (97.4%) | C (61.5%)      |
| B2O3/13 | Symmetry (86,8%)  | ≤10% (100%)     | Abscense (100%)  | Abscense (94.9%) | B (71.8%)      |
| B2O4/13 | Symmetry (97,4%)  | ≤10% (59,0%)    | Abscense (100%)  | Abscense (100%)  | B (48.7%)      |
| B2O5/13 | Symmetry (61,5%)  | >25-36% (51.3%) | Abscense (100%)  | Abscense (100%)  | C (57.9%)      |
| B3O1/13 | Asymmetry (91,9%) | >10-25% (47.4%) | Abscense (100%)  | Abscense (100%)  | C (92.1%)      |
| B3O2/13 | Symmetry (56,4%)  | ≤10% (97.4%)    | Abscense (64.1%) | Abscense (100%)  | B (38.5%)      |
| B3O3/13 | Symmetry (97,4%)  | >10-25% (71.1%) | Abscense (100%)  | Abscense (100%)  | B (79.5%)      |
| B3O4/13 | Asymmetry (66,7%) | >36% (89.2%)    | Abscense (97.1%) | Abscense (100%)  | D (78.4%)      |
| B3O5/13 | Symmetry (78,9%)  | ≤10% (100%)     | Abscense (100%)  | Abscense (100%)  | D (56.4%)      |
| B1O1/14 | Symmetry (51,4%)  | ≤10% (100%)     | Abscense (89.2%) | Abscense (100%)  | NC (33.3%)     |
| B1O2/14 | Symmetry (82,1%)  | ≤10% (97.4%)    | Abscense (94.9%) | Abscense (100%)  | A (71.8%)      |
| B1O3/14 | Symmetry (84,6%)  | ≤10% (76.9%)    | Abscense (100%)  | Abscense (100%)  | A (66.7%)      |
| B1O4/14 | Symmetry (97,4%)  | ≤10% (100%)     | Abscense (66.7%) | Abscense (92.3%) | A (56.4%)      |
| B1O5/14 | Symmetry (94,9%)  | ≤10% (100%)     | Abscense (100%)  | Abscense (100%)  | A (92.3%)      |
| B2O1/14 | Asymmetry (89,5%) | ≤10% (100%)     | Abscense (100%)  | Abscense (100%)  | C (97.4%)      |
| B2O2/14 | Asymmetry (97,4%) | ≤10% (81.6%)    | Abscense (81.6%) | Abscense (92.1%) | C (71.1%)      |
| B2O3/14 | Symmetry (68,4%)  | ≤10% (100%)     | Abscense (94.7%) | Abscense (94.7%) | B (62.6%)      |
| B2O4/14 | Symmetry (100%)   | ≤10% (100%)     | Abscense (100%)  | Abscense (100%)  | B (65.8%)      |
| B2O5/14 | Asymmetry (97,4%) | >10-25% (73.7%) | Abscense (97.4%) | Abscense (86.8%) | C (52.6%)      |
| B3O1/14 | Asymmetry (81,6%) | ≤10% (100%)     | Abscense (100%)  | Abscense (100%)  | C (86.8%)      |
| B3O2/14 | Asymmetry (100%)  | >10-25% (71.1%) | Abscense (100%)  | Abscense (97.4%) | C (97.4%)      |
| B3O3/14 | Symmetry (100%)   | ≤10% (100%)     | Abscense (97.4%) | Abscense (97.4%) | B (94.8%)      |
| B3O4/14 | Symmetry (81,6%)  | ≤10% (71.1%)    | Abscense (100%)  | Abscense (97.3%) | A (39.5%)      |
| B3O5/14 | Symmetry (73,7%)  | ≤10% (100%)     | Abscense (100%)  | Abscense (97.4%) | A (65.8%)      |

S5 Table. Morphological characteristics of the Day 2 and Day 3 embryos analysed with CMA (continuation).

| CMA     | Day 3             |                 |                  |                  | Classification |
|---------|-------------------|-----------------|------------------|------------------|----------------|
|         | Asymmetry         | Fragmentation   | Multinucleation  | Vacuoles         |                |
| B1O1/13 | Symmetry (89,7%)  | ≤10% (97.4%)    | Abscense (97.4%) | Abscense (97.4%) | B (60.5%)      |
| B1O2/13 | Symmetry (94,9%)  | ≤10% (100%)     | Abscense (100%)  | Abscense (100%)  | A (89.7%)      |
| B1O3/13 | Symmetry (94,9%)  | ≤10% (100%)     | Abscense (100%)  | Abscense (100%)  | A (84.6%)      |
| B1O4/13 | Asymmetry (59,0%) | ≤10% (92.3%)    | Abscense (97.4%) | Abscense (100%)  | C (59.0%)      |
| B1O5/13 | Symmetry (81,6%)  | ≤10% (92.1%)    | Abscense (100%)  | Abscense (100%)  | A (52.6%)      |
| B2O1/13 | Asymmetry (97,3%) | >10-25% (71.1%) | Abscense (86.8%) | Abscense (100%)  | C (44.7%)      |
| B2O2/13 | Asymmetry (63,9%) | >10-25% (68.4%) | Abscense (100%)  | Abscense (55.3%) | C (60.5%)      |
| B2O3/13 | Symmetry (81,6%)  | ≤10% (100%)     | Abscense (100%)  | Abscense (100%)  | B (73.7%)      |
| B2O4/13 | Asymmetry (88,9%) | ≤10% (66,7%)    | Abscense (97.2%) | Abscense (100%)  | C (91.7%)      |
| B2O5/13 | Symmetry (82,9%)  | >25-36% (42,9%) | Abscense (100%)  | Abscense (100%)  | C (51.4%)      |
| B3O1/13 | Asymmetry (71,4%) | >36% (37,9%)    | Abscense (96.4%) | Abscense (100%)  | D (85.7%)      |
| B3O2/13 | Symmetry (86,1%)  | ≤10% (97.3%)    | Abscense (100%)  | Abscense (100%)  | D (94.4%)      |
| B3O3/13 | Symmetry (70,3%)  | >25-36% (71.8%) | Abscense (100%)  | Abscense (97.4%) | D (89.5%)      |
| B3O4/13 | Symmetry (71,9%)  | >36% (93.8%)    | Abscense (100%)  | Abscense (100%)  | D (83.3%)      |
| B3O5/13 | Symmetry (94,6%)  | ≤10% (100%)     | Abscense (100%)  | Abscense (100%)  | C (54.1%)      |
| B1O1/14 | Symmetry (97,4%)  | ≤10% (100%)     | Abscense (100%)  | Abscense (100%)  | A (59.0%)      |
| B1O2/14 | Symmetry (89,7%)  | ≤10% (97,4%)    | Abscense (97.4%) | Abscense (100%)  | A (71.8%)      |
| B1O3/14 | Symmetry (53,8%)  | ≤10% 66,7%)     | Abscense (81.6%) | Abscense (97.4%) | B (38.5%)      |
| B1O4/14 | Symmetry (69,2%)  | ≤10% (100%)     | Abscense (94.9%) | Abscense (100%)  | A (50.0%)      |
| B1O5/14 | Symmetry (100%)   | ≤10% (100%)     | Abscense (97.4%) | Abscense (100%)  | A (94.7%)      |
| B2O1/14 | Symmetry (55,3%)  | ≤10% (100%)     | Abscense (100%)  | Abscense (100%)  | C (73.7%)      |
| B2O2/14 | Asymmetry (81,1%) | ≤10% (78,9%)    | Abscense (100%)  | Abscense (97.4%) | C (67.6%)      |
| B2O3/14 | Asymmetry (55,3%) | ≤10% (100%)     | Abscense (100%)  | Abscense (100%)  | B (54.1%)      |
| B2O4/14 | Asymmetry (81,6%) | ≤10% (94,7%)    | Abscense (94.7%) | Abscense (94.4%) | C (92.1%)      |
| B2O5/14 | Asymmetry (73,7%) | >25-36% (71.1%) | Abscense (97.4%) | Abscense (92.1%) | C (43.2%)      |
| B3O1/14 | Asymmetry (89,5%) | ≤10% (100%)     | Abscense (97.4%) | Abscense (100%)  | D (92.1%)      |
| B3O2/14 | Asymmetry (84,2%) | >25-36% (84.2%) | Abscense (100%)  | Abscense (97.4%) | D (70.3%)      |
| B3O3/14 | Symmetry (100%)   | ≤10% (97,3%)    | Abscense (100%)  | Abscense (100%)  | D (97.3%)      |
| B3O4/14 | Symmetry (60,5%)  | ≤10% (71,1%)    | Abscense (100%)  | Abscense (100%)  | C (27.0%)      |
| B3O5/14 | Symmetry (89,5%)  | ≤10% (100%)     | Abscense (100%)  | Abscense (100%)  | D (97.4%)      |
