# Supplementary material for: Inter-laboratory agreement on embryo classification and clinical decision: Conventional morphological assessment vs. time lapse
Source: PubMed Central journal article supplement (PMC5571938; doi:10.1371/journal.pone.0183328), 2017-08-25
Supplement: pone.0183328.s006.pdf [file pone.0183328.s006.pdf]

S6 Table. Morphological classification and clinical decision of the Day 5 embryos analysed with CMA.

| CMA     | Classification | Decision              |
|---------|----------------|-----------------------|
| B4O1/13 | B (45.5%)      | Cryopreserve (69.2%)  |
| B4O2/13 | B (51.5%)      | Cryopreserve (66.7%)  |
| B4O3/13 | B (63.6%)      | Cryopreserve (84.6%)  |
| B4O4/13 | B (43.8%)      | Cryopreserve (74.4%)  |
| B4O5/13 | B (35.3%)      | Cryopreserve (56.4%)  |
| B5O1/13 | B (57.1%)      | Transfer (71.8%)      |
| B5O2/13 | B (61.1%)      | Cryopreserve (74.4%)  |
| B5O3/13 | C (54.3%)      | Cryopreserve (53.9%)  |
| B5O4/13 | C (42.9%)      | Cryopreserve (55.3%)  |
| B5O5/13 | C (75.0%)      | Cryopreserve (63.16%) |
| B4O1/14 | B (66.7%)      | Cryopreserve (68.4%)  |
| B4O2/14 | B (48.4%)      | Cryopreserve (60.0%)  |
| B4O3/14 | A (41.4%)      | Transfer (62.2%)      |
| B4O4/14 | B (60.7%)      | Cryopreserve (77.8%)  |
| B4O5/14 | C (55.6%)      | Cryopreserve (75.7%)  |
| B5O1/14 | C (71.9%)      | Cryopreserve (48.7%)  |
| B5O2/14 | C (73.5%)      | Cryopreserve (50.0%)  |
| B5O3/14 | C (54.6%)      | Discard (67.6%)       |
| B5O4/14 | C (44.4%)      | Transfer (83.8%)      |
| B5O5/14 | D (56.3%)      | Discard (84.2%)       |
